# Supplementary material for: Mito-nuclear discordance within Anthozoa, with notes on unique properties of their mitochondrial genomes
Source: PubMed Central journal article supplement (PMC10167242; doi:10.1038/s41598-023-34059-1), 2023-05-08
Supplement: 41598_2023_34059_MOESM1_ESM.pdf [file 41598_2023_34059_MOESM1_ESM.pdf]

A. Hexacorallia

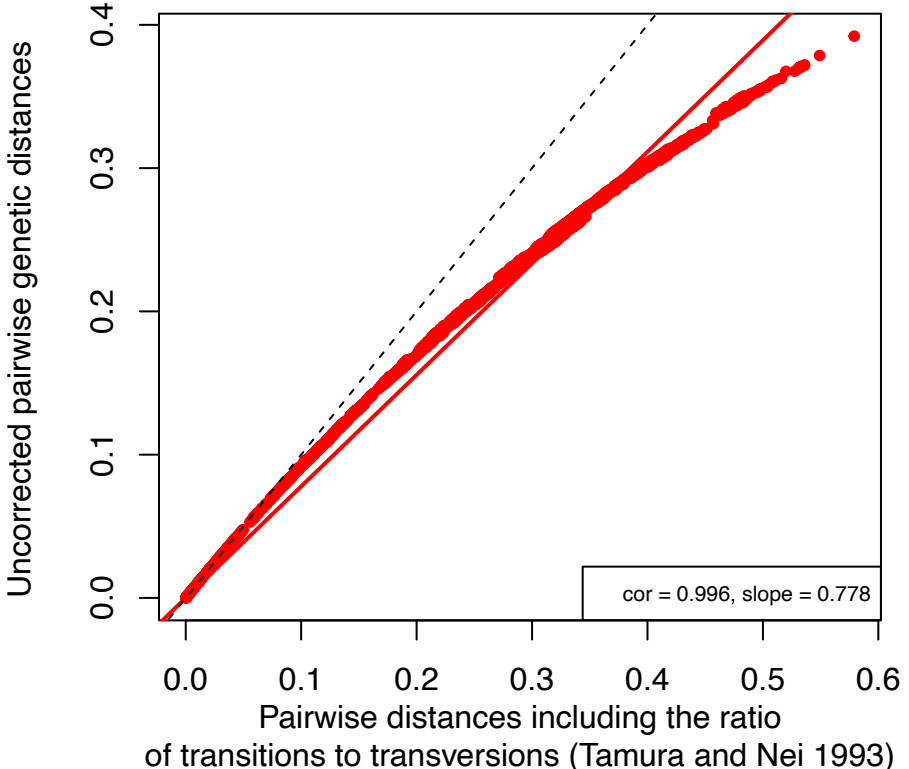

B. Octocorallia

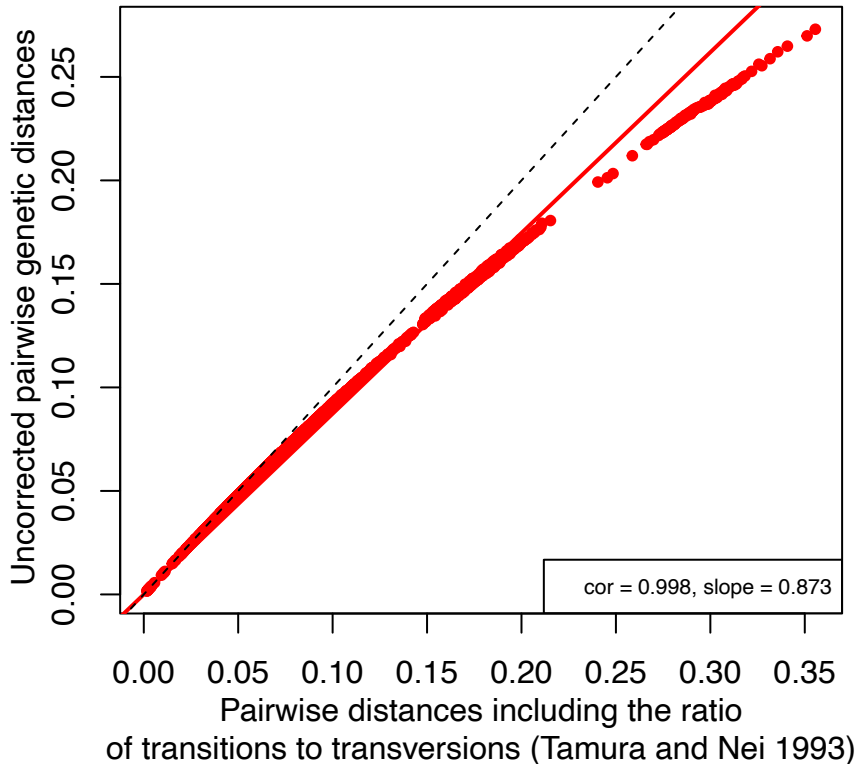

z

Suppl. Figure 1. Substitution saturation plots for A) Hexacorallia and B) Octocoralla.
